# Supplementary material for: Toward Revealing Microcystin Distribution in Mouse Liver Tissue Using MALDI-MS Imaging
Source: MDPI journal article supplement (doi:10.3390/toxins13100709), 2021-10-08
Supplement: s1 [file s1]

# Supplementary Materials: Toward Revealing Microcystin Distribution in Mouse Liver Tissue Using MALDI-MS Imaging

Daria Kucheriavaia, Dusan Velickovic, Nicholas Peraino, Apurva Lad, David J. Kennedy, Steven T. Haller, Judy A. Westrick, and Dragan Isailovic

## Estimate of MC-LR amount in a liver tissue section per MALDI spot

According to the literature sources, the average mouse liver weight 2.5 g and its width and length could be approximated for the NAFLD mouse to 2 cm with 2 cm in height.<sup>1</sup> Based on the HPLC-ESI-MS data,<sup>2</sup> the average concentration of free MC-LR in the sample is ~15 ng/g of liver.

We can estimate the mass of the MC-LR in the whole liver of the mouse as:

$$m_l = 15 \text{ ng/g} \times 2.5 \text{ g} = 37.5 \text{ ng},$$

The volume of the whole mouse liver is:

$$V_l = 2 \text{ cm} \times 2 \text{ cm} \times 2 \text{ cm} = 8 \text{ cm}^3.$$

Next, we can approximate that the thickness of one section is 10  $\mu\text{m}$ , and the volume of one section with the thickness of ~10  $\mu\text{m}$  (0.001 cm) is:

$$V_s = 2 \text{ cm} \times 2 \text{ cm} \times 0.001 \text{ cm} = 0.004 \text{ cm}^3$$

Mass of the MC-LR in one liver section is:

$$m_s = \frac{0.004 \text{ cm}^3 \times 37.5 \text{ ng}}{8 \text{ cm}^3} = 0.01875 \text{ ng} = 18.75 \text{ pg}$$

The volume of the one spot during imaging with 100  $\mu\text{m}$  (0.01 cm) laser beam diameter assuming a cylindrical shape and ablation depth of 200 nm is:

$$V_s = 3.14 \times (0.005 \text{ cm})^2 \times 200 \text{ nm} = 1.57 \times 10^{-9} \text{ cm}^3$$

Mass of the MC-LR in one analyzed spot during 1 laser shot.

$$m_{\text{spot/shot}} = \frac{1.57 \times 10^{-9} \text{ cm}^3 \times 18.75 \text{ pg}}{0.004 \text{ cm}^3} = 0.00000736 \text{ pg}$$

Considering that we ablate spot with 500 shots:

$$m_{\text{spot}} = 0.00000736 \text{ pg} \times 500 = 0.0037 \text{ pg}$$

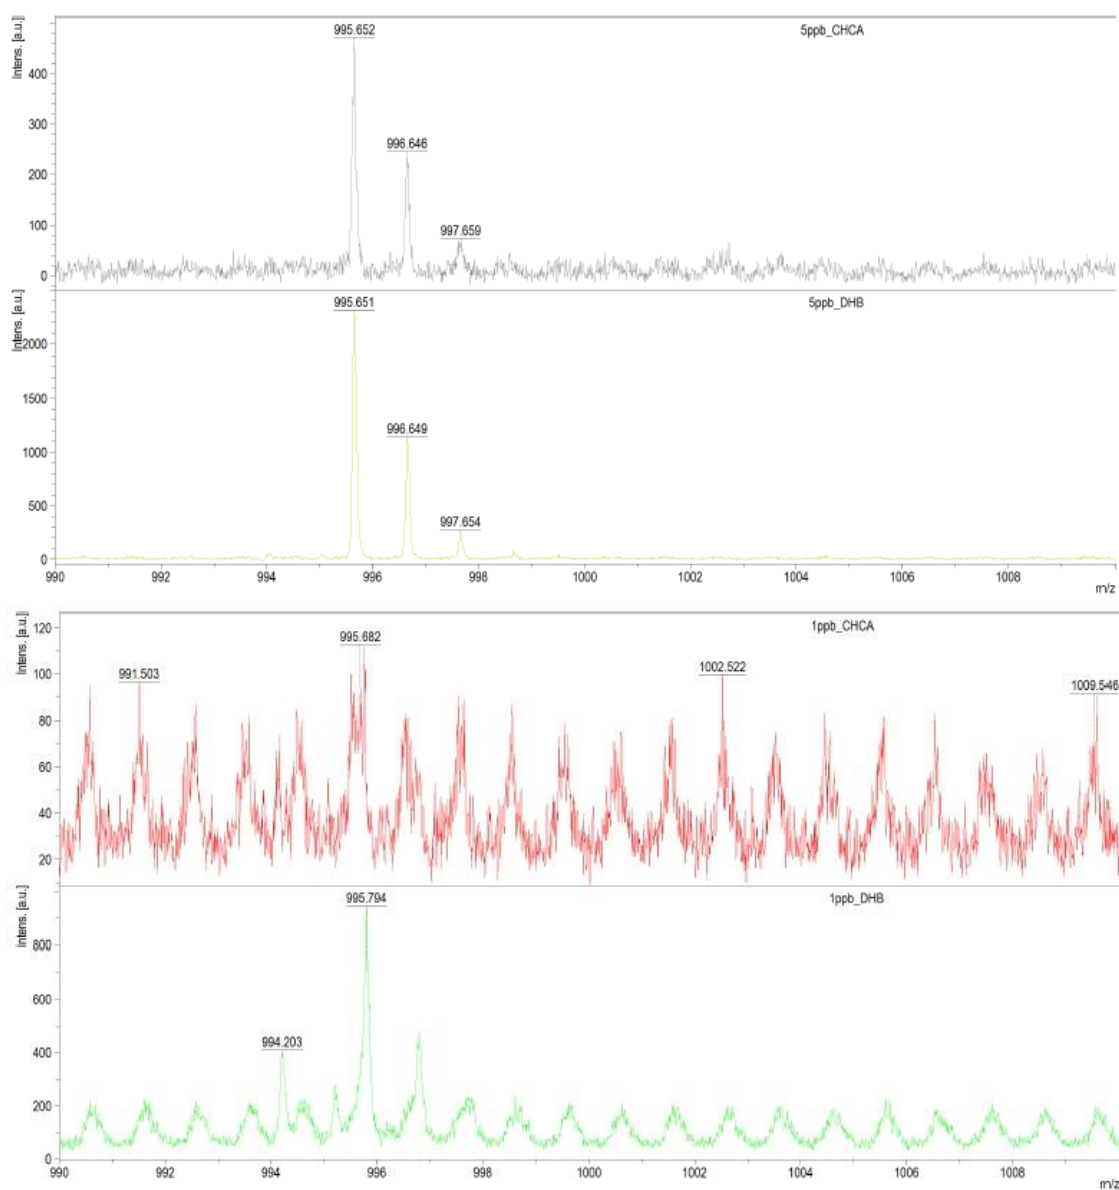

**Figure S1.** MALDI-TOF mass spectra of 5 µg/L (a) and 1 µg/L (b) MC-LR solutions in the presence of CHCA and DHB.

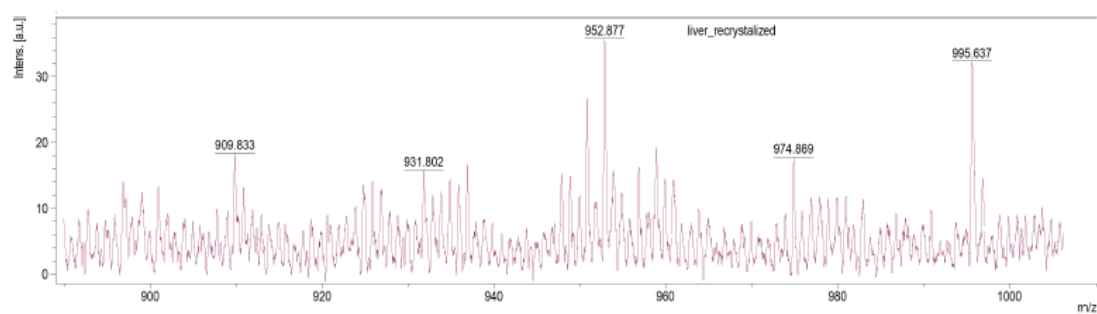

**Figure S2.** MALDI-TOF mass spectrum of the section of mouse liver after two cycles of matrix recrystallization and application of random walk mode.

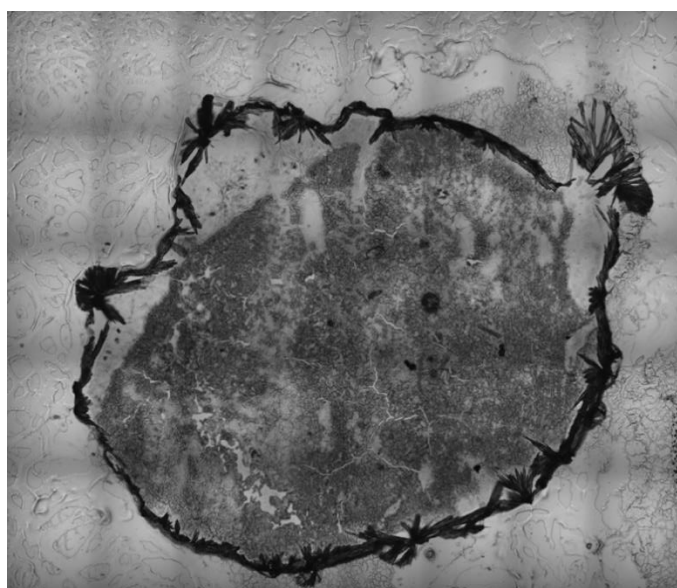

**Figure S3.** Microscope image of the tissue with the crystals of the DHB matrix formed around the edges acquired with 10× magnification.

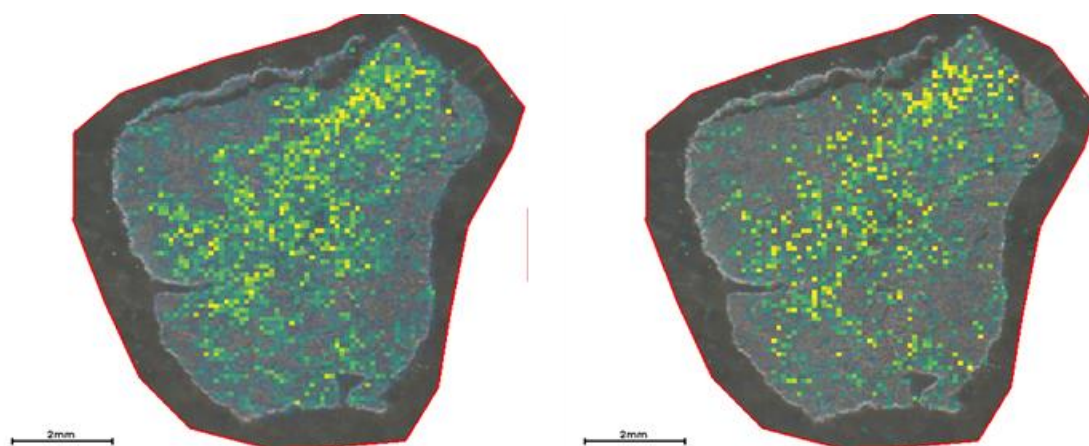

**Figure S4.** Isotopologue ion images for [MC-LR + H]<sup>+</sup> (*m/z* 995.5559 and 996.5601) in liver sections from wild-type mouse gavaged with 100 µg MC-LR/kg.

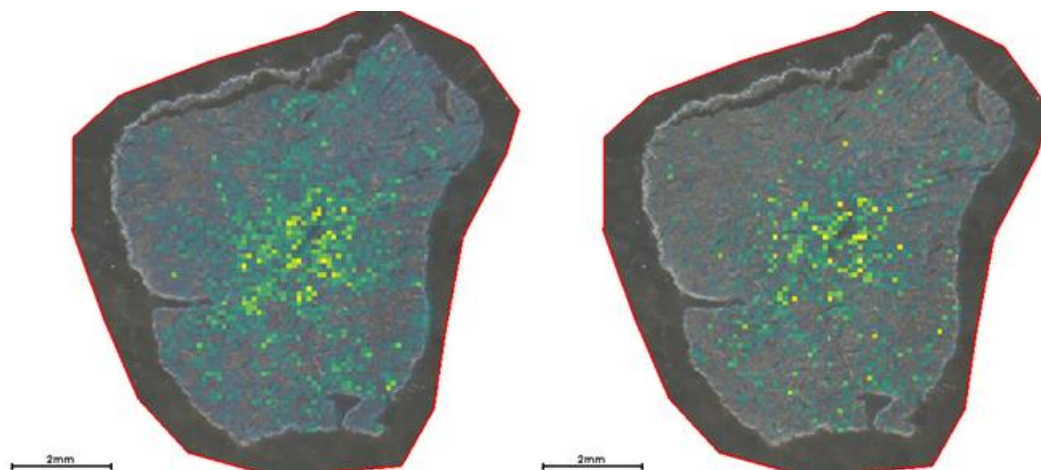

**Figure S5.** Isotopologue ion images for [MC-LR + Na]<sup>+</sup> (*m/z* 1017.5381 and 1018.5421) in liver sections from wild-type mouse gavaged with 100 µg MC-LR/kg.

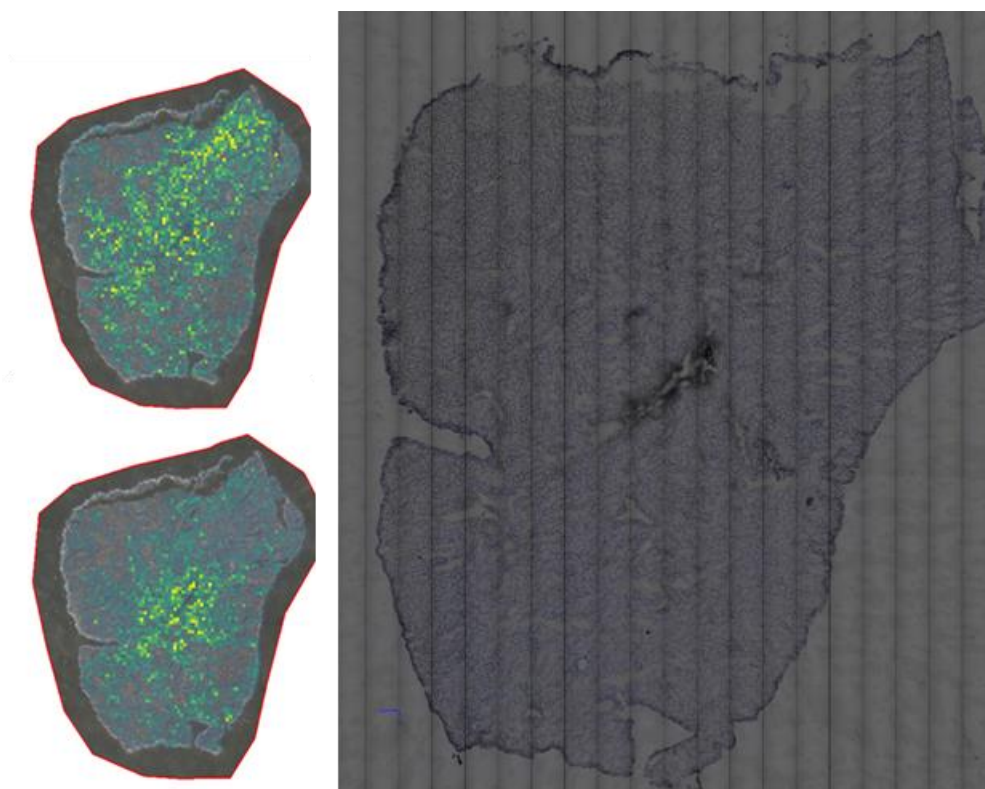

**Figure S6.** Confocal vs. ion images of MC-LR (+H<sup>+</sup>/+Na<sup>+</sup>) in adjacent WT 100 µg/kg tissue sections.

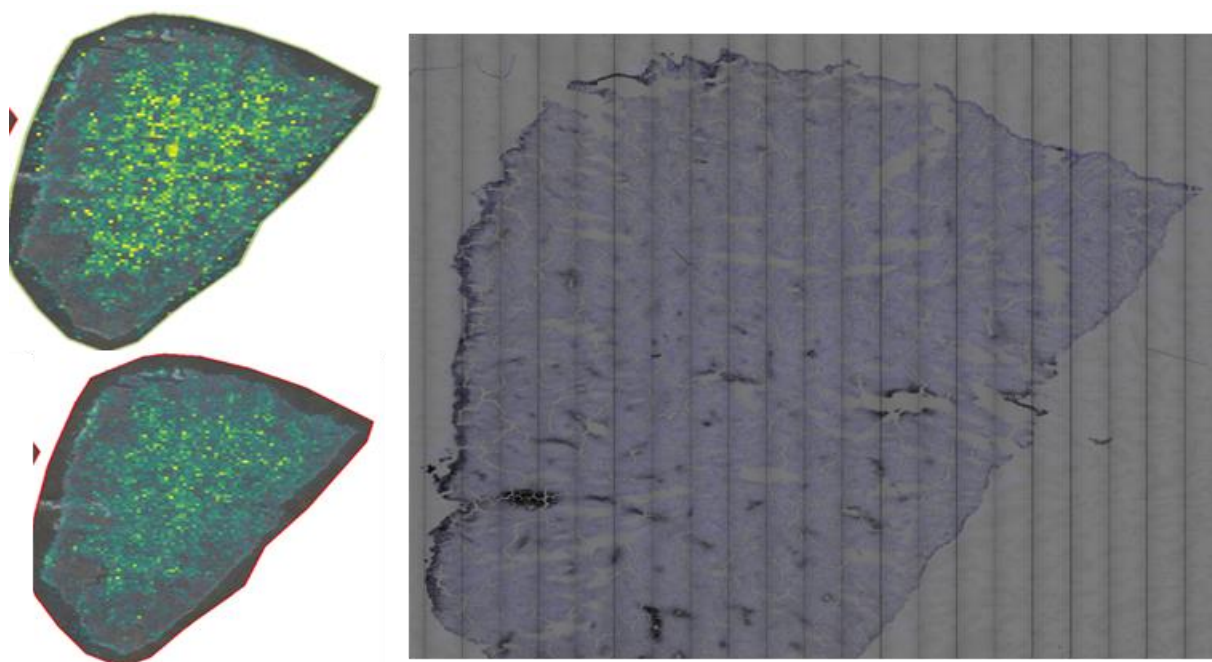

**Figure S7.** Confocal vs. ion images of MC-LR ( $+H^{+}/+Na^{+}$ ) in adjacent NAFLD 100  $\mu\text{g/kg}$  tissue sections.

## References:

1. Miller, W.; Siantar, C.; Fisher, D.; Descalle, M.-A.; Daly, T.; Lehmann, J.; Lewis, M.; Hoffman, T.; Smith, J.; Situ, P.; Volkert, W., Evaluation of Beta-Absorbed Fractions in a Mouse Model for  $^{90}\text{Y}$ ,  $^{188}\text{Re}$ ,  $^{166}\text{Ho}$ ,  $^{149}\text{Pm}$ ,  $^{64}\text{Cu}$ , and  $^{177}\text{Lu}$  Radionuclides. *Cancer Biother. Radio.* **2005**, *20*, 436–49.
2. Baliu-Rodriguez, D.; Kucheriavaia, D.; Palagama, D.S.W.; Lad, A.; O'Neill, G.M.; Birbeck, J.A.; Kennedy, D.J.; Haller, S.T.; Westrick, J.A.; Isailovic, D., Development and Application of Extraction Methods for LC-MS Quantification of Microcystins in Liver Tissue. *Toxins* **2020**, *12*, 263.
